# Supplementary material
Source: Springer Nature journal article supplement (https://www.springermedizin.de/resource/supplementary/12985_2010_1082_MOESM4_ESM.pdf/9609104)
Supplement: MOESM4 [file 9609104]

10 20 30 40 50 60 70 80 90 100

S1\_Clone1 TAA TCAA TGAG TTTTT CAA ATTGCT GTTG TTTCTTTT GTTG TAAG TCTTTGACGAT ACTTTT AATAAAT AAAAT GTCCA TTTT ACT - GCTAAGAATG

S1\_Clone4 TAA TCAA TGAG TTTTT CAA ATTGCT GTTG TTTCTTTT GTTG TAAG TCTTTGACGAT ACTTTT AATAAAT AAAAT GTCCA TTTT A - AGCTAAGAATG

S1\_Clone5 TAA TCAA TGAG TTTTT CAA ATTGCT GTTG TTTCTTTT GTTG TAAG TCTTTGACGAT ACTTTT AATAAAT AAAAT GTCCA TTTT ACTAGCTAAGAATG

S1\_Clone6 TAA TCAA TGAG TTTTT CAA ATTGCT GTTG TTTCTTTT GTTG TAAG TCTTTGACGAT ACTTTT AATAAAT AAAAT GTCCA TTTT ACTAGCTAAGAATG

S1\_Clone7 TAA TCAA TGAG TTTTT CAA ATTGCT GTTG TTTCTTTT GTTG TAAG TCTTTGACGAT ACTTTT AATAAAT AAAAT GTCCA TTTT ACTAGCTAAGAATG

10 20 30 40 50 60 70 80 90 100 110 120

S2\_Clone24 TGA TTTTGTGTAGTGGTGATATACCC TTTTGTATTAATAAAGCTGTGTAAACCGAATTGACGATATA TTTTAAAGTAAAAGAGCATTTTTT AC-TGCAAGAACGCTCTTTAATAACCATG

S2\_Clone28 TGA TTTTGTGTAGTGGTGATATACCC TTTTGTATTAATAAAGCTGTGTAAACCGAATTGACGATATA TTTTAAAGTAAAAGAGCATTTTTT .....GCAAGAACGCTCTTTAATAACCATG

S2\_Clone13 TGA TTTTGTGTAGTGGTGATATACCC TTTTGTATTAATAAAGCTGTGTAAACCGAATTGACGATATA TTTTAAAGTAAAAGAGCATTT.....AGCAAGAACGCTCTTTAATAACCATG

S2\_Clone27 TGA TTTTGTGTAGTGGTGATATACCC TTTTGTATTAATAAAGCTGTGTAAACCGAATTGACGATATA TTTTAAAGTAAAAGAGCATTTTTT ACTAGCAAGAACGCTCTTTAATAACCATG

S2\_Clone17 TGA TTTTGTGCGATGGTGATATACCC TTTTGTATTAATAAAGCTGTGTAAACCGAATTGACGATATA TTTTAAAGTAAAAGAGCATTTTTT ACTAGCAAGAACGCTCTTTAATAACCATG

10 20 30 40 50 60 70 80 90 100 110 120 130 140 150 160 170 180 190

S3\_Clone30 TGA AACTGCACATGTAA TTAAGTAGTTACTCTATGTTATGATACACTTAATGAAGCATAATATAATTTGGGTTTGGG TATTATTAATAAATTAATTAACGGTATTGACGATATTAACAAATAAAAGAAAAGCAATTTAAG...CAAAGATTGCTCAAAATCCC AAAAATAACAGAAAACGTTAAGAGATG

S3\_Clone50 TGA AACTGCACATGTAA TTAAGTAGTTACTCTATGTTATGATACACTTAATGAAGCATAATATAATTTGGGTTTGGG TATTATTAATAAATTAATTAACGGTATTGACGATATTAACAAATAAAAGAAAAGCAATTTAA...CTTGGCTCAAAATCCC AAAAATAACAGAAAACGTTAAGAGATG

S3\_Clone98 TGA AACTGCACATGTAA TTAAGTAGTTACTCTATGTTATGATACACTTAATGAAGCATAATATAATTTGGGTTTGGG TATTATTAATAAATTAATTAACGGTATTGACGATATTAACAAATAAAAGAAAAGCAATTTAACT-GCAAAGATTGCTCAAAATCCC AAAAATAACAGAAAACGTTAAGAGATG

S3\_Clone27 TGA AACTGCACATGTAA TTAAGTAGTTACTCTATGTTATGATACACTTAATGAAGCATAATATAATTTGGGTTTGGG TATTATTAATAAATTAATTAACGGTATTGACGATATTAACAAATAAAAGAAAAGCAATTTAACTAGCAAAGATTGCTCAAAATCCC AAAAATAACAGAAAACGTTAAGAGATG

S3\_Clone43 ..... TGA TACACTTAATGAAGCATAATATAATTTGGGTTTGGG TATTATTAATAAATTAATTAACGGTATTGACGATATTAACAAATAAAAGAAAAGCAATTTAACTAGCAAAGATTGCTCAAAATCCC AAAAATAACAGAAAACGTTAAGAGATG

10 20 30 40 50 60 70 80 90

S4\_Clone5 TAA GTTGTGTTTAC TTGTAAATTGTTGTGTTTGACGATATG TATTTT CAAAAAGCCAATTTTTT ACT--CTAAGATTGGCTGTTTCAAGATG

S4\_Clone11 TAA GTTGTGTTTAC TTGTAAATTGTTGTGTTTGACGATATG TATTTT CAAAAAGCCAATTTTTT ACT--CTAAGATTGGCTGTTTCAAGATG

S4\_Clone6 TAA GTTGTGTTTAC TTGTAAATTGTTGTGTTTGACGATATG TATTTT CAAAAAGCCAATTTTTT ACTAGCTAAGATTGGCTGTTTCAAGATG

S4\_Clone1 TAA GTTGTGTTTAC TTGTAAATTGTTGTGTTTGACGATATG TATTTT CAAAAAGCCAATTTTTT ACTAGCTAAGATTGGCTGTTTCAAGATG

S4\_Clone3 TAA GTTGTGTTTAC TTGTAAATTGTTGTGTTTGACGATATG TATTTT CCAAG-----CTAAGATTGGCTGTTTCAAGATG

10 20 30 40 50 60 70 80 90 100 110 120 130 140 150 160 170

S8\_Clone4 TAA TTAATCATCTCAACTACTCATTTATGTTATACTAAATTTGGTGAATGAATCTAAAGATTTCTTGTGTTTTCATTTCTATGTGTTGAATGGGATATTTGGGTTGTGACTTTGATCATTATACAAAAGATAAAAAGCCTTTTTTTACTAGCAAAGATTGGCTATCTACCATG

S8\_Clone8 TAA TTAATCATCTCAACTACTCATTTATGTTATACTAAATTTGGTGAATGAATCTAAAGATTTCTTGTGTTTTCATTTCTATGTGTTGAATGGGATATTTGGGTTGTGACTTTGATCATTATACAAAAGATAAAAAGCCTTTTTTTACTAGCAAAGATTGGCTATCTACCATG

S8\_Clone10 TAA TTAATCATCTCAACTACTCATTTATGTTATACTAAATTTGGTGAATGAATCTAAAGATTTCTTGTGTTTTCATTTCTATGTGTTGAATGGGATATTTGGGCTGTGACTTTGATCATTATACAAAAGATAAAAAGCCTTTTTTTACTAGCAAAGATTGGCTATCTACCATG

S8\_Clone3 TAA TTAATCATCTCAACTACTCATTTATGTTATACTAAATTTGGTGAATGAATCTAAAGATTTCTTGTGTTTTCATTTCTATGTGTTGAATGGGATATTTGGGTTGTGACTTTGATCATTATACAAAAGATAAAAAGCCTTTTTTTACTAGCAAAGATTGGCTATCTACCATG

S8\_Clone5 TAA TTAATCATCTCAACTACTCATTTATGTTATACTAAATTTGGTGAATGAATCTAAAGATTTCTTGTGTTTTCATTTCTATGTGTTGAATGGGATATTTGGGTTGTGACTTTGATCATTATACAAAAGATAAAAAGCCTTTTTTTACTAGCAAAGATTGGCTATCTACCATG
